# Supplementary material
Source: publisher figshare collection journal article supplement (https://acs.figshare.com/ndownloader/files/13568981)
Supplement: Supplementary file 1 [file 13568981]

## Sheet: n-type TCs
Material			Structure and composition		Counting studies		Stability	Transparency						Transport													Dopability					Other
#	MP task ID	n pretty formula	n dopant(s)	space group symbol	Number of studies (google scholar)	Number of studies (range)	Energy above hull	Minimum experimental gap (eV)	Maximum experimental gap (eV)	PBE band gap (eV)	PBE direct gap (eV)	HSE06 band gap (eV)	HSE06 direct gap (eV)	Max conductivity (S/cm)	Associated carrier concentration (cm^-3)	Max conductivity dopant	Max conductivity synthesis	Max conductivity reference	Max conductivity link	Max mobility (cm2/Vs)	Max mobility dopant	Max mobility synthesis	Max mobility reference	Max mobility link	m* avg (10^20 cm^-3, 300 K)	m* planar (10^20 cm^-3)	dopant	BPE ratio for VB:CB = 4:2 (highlight--> min 3 CB)	BPE min ratio (for p screening)	BPE max ratio (for n screening)	Degenerate bands?	mp link
1	mp-856	SnO2	undoped, F, Cl, Sb, Sb, As, Nb, Ta	P4_2/mnm	1580	>1000	0	3.15	3.87	0.6519	0.6519	2.3692	2.3692	6666.67	2.89e+21	As	CVD	Vishwakarma, S. R., Upadhyay, J. P., & Prasad, H. C. (1989). Physical properties of arsenic-doped tin oxide thin films. Thin Solid Films, 176(1), 99-110.	https://doi.org/10.1016/0040-6090(89)90368-4	110	Cl	spray pyrolysis with SnCl2 precursor	Elangovan, E., & Ramamurthi, K. (2005). A study on low cost-high conducting fluorine and antimony-doped tin oxide thin films. Applied Surface Science, 249(1), 183-196.	http://www.sciencedirect.com/science/article/pii/S0169433204017453	0.234741	0.234741	n(p)	1.212	1.14515	1.46913	no	https://materialsproject.org/materials/mp-856
2	mp-22598	In2O3	Sn, Ge, Sn/Ge, Mo, F, Ti, H, H/Ce, Ce, Zn, Zr, Hf, Nb, Ta, W, Te	Ia3	2370	>1000	0	3.5	4.3	0.9324	0.9372	2.3745	2.3793	22727.3	2.5e+21	Sn	e-beam with zone confinement	Rauf I A 1996 J. Appl. Phys. 79 4057	http://aip.scitation.org/doi/abs/10.1063/1.361882	159	Ti	PLD	Gupta P, Ghosh K, Mishra S, Kahol P, Mater. Lett. 62, 1033 (2008)	http://www.sciencedirect.com/science/article/pii/S0167577X07007574	0.230433	0.230433	n(p)	0.947	0.905437	1.11172	no	https://materialsproject.org/materials/mp-22598
3	mp-2133	ZnO	self, Al, Al/H, Ga, B, Si, In, Y, Sc, F, V, Ge, Ti, Zr, Hf	P6_3mc	12900	>1000	0	3.2	3.5	0.7317	0.7317	2.4034	2.4034	19607.8	1.46e+22	Ga	buffer assisted pulsed laser deposition	R. S. Ajimsha, A. K. Das, P. Misra, M. P. Joshi, L. M. Kukreja, R. Kumar, T. K. Sharma and S. M. Oak, J. Alloys Compd., 2015, 638, 55–58	http://www.sciencedirect.com/science/article/pii/S0925838815006027	120	self-doped	RS(radical source)‐MBE	Iwata, K., Fons, P., Niki, S., Yamada, A., Matsubara, K., Nakahara, K., & Takasu, H. (2000). Improvement of Electrical Properties in ZnO Thin Films Grown by Radical Source (RS)‐MBE. physica status solidi (a), 180(1), 287-292.	https://onlinelibrary.wiley.com/doi/abs/10.1002/1521-396X(200007)180:1%3C287::AID-PSSA287%3E3.0.CO;2-7	0.259164	0.259164	n(p)	1.244	1.17086	1.48628	min 2VB	https://materialsproject.org/materials/mp-2133
4	mp-1132	CdO	undoped, Sc, In, Ga, Sn, Y	Fm-3m	601	500-1000	0	2.4	3.4	0	0	0.8608	0.8608	42000	8.4e+20	Sn	PLD	Yan, M., Lane, M., Kannewurf, C. R., & Chang, R. P. H. (2001). Highly conductive epitaxial CdO thin films prepared by pulsed laser deposition. Applied Physics Letters, 78(16), 2342-2344.	http://aip.scitation.org/doi/abs/10.1063/1.1365410	609	Sn	PLD	Yan, M., Lane, M., Kannewurf, C. R., & Chang, R. P. H. (2001). Highly conductive epitaxial CdO thin films prepared by pulsed laser deposition. Applied Physics Letters, 78(16), 2342-2344.	http://aip.scitation.org/doi/abs/10.1063/1.1365410	0.177093	0.177093	n	2.946	2.80881	5.56302	no	https://materialsproject.org/materials/mp-1132
5	mp-2657	TiO2	Nb, Ta	P4_2/mnm	3790	>1000	0.036733	3	3.69	1.781	1.781	3.2418	3.2418	4300	1.7e+21	Nb	PLD	Y. Furubayashi, T. Hitosugi, Y. Yamamoto, K. Inaba, G. Kinoda, Y. Hirose, T. Shimada and T. Hasegawa: Appl. Phys. Lett. 86 (2005), 252101.	http://aip.scitation.org/doi/abs/10.1063/1.1949728	22	Nb	PLD	Y. Furubayashi, T. Hitosugi, Y. Yamamoto, K. Inaba, G. Kinoda, Y. Hirose, T. Shimada and T. Hasegawa: Appl. Phys. Lett. 86 (2005), 252101.	http://aip.scitation.org/doi/abs/10.1063/1.1949728	1.01559	1.01559	n(p)	0.379	0.335599	0.448977	no	https://materialsproject.org/materials/mp-2657
6	mp-886	Ga2O3	Sn	C2/m	374	100-500	0	4.4	4.8	2.008	2.008	3.8305	3.8305	23.4192	2.26e+18	Sn	floating zone (single crystal)	Suzuki, N., Ohira, S., Tanaka, M., Sugawara, T., Nakajima, K., & Shishido, T. (2007). Fabrication and characterization of transparent conductive Sn‐doped β‐Ga2O3 single crystal. physica status solidi (c), 4(7), 2310-2313.	http://onlinelibrary.wiley.com/doi/10.1002/pssc.200674884/full	65	Sn	floating zone (single crystal)	Suzuki, N., Ohira, S., Tanaka, M., Sugawara, T., Nakajima, K., & Shishido, T. (2007). Fabrication and characterization of transparent conductive Sn‐doped β‐Ga2O3 single crystal. physica status solidi (c), 4(7), 2310-2313.	http://onlinelibrary.wiley.com/doi/10.1002/pssc.200674884/full	0.276389	0.276389	n	0.884	0.855286	1.01603	no	https://materialsproject.org/materials/mp-886
7	mp-5966	Cd2SnO4	Sb, undoped, self	Pbam	25	20-50	0	2.7	3.1	0.3998	0.4324	1.8287	1.8613	8333.33	2e+21	self-doped	RF sputtering	Wu, X., Coutts, T. J., & Mulligan, W. P. (1997). Properties of transparent conducting oxides formed from CdO and ZnO alloyed with SnO 2 and In 2 O 3. Journal of Vacuum Science & Technology A: Vacuum, Surfaces, and Films, 15(3), 1057-1062.	http://avs.scitation.org/doi/pdf/10.1116/1.580429	65	undoped	RF magnetron sputtering	Coutts, T. J., Wu, X., Mulligan, W. P., & Webb, J. M. (1996). High-performance, transparent conducting oxides based on cadmium stannate. Journal of electronic materials, 25(6), 935-943.	https://link.springer.com/article/10.1007/BF02666727	0.225453	0.225453	n	1.417	1.38008	1.55274	no	https://materialsproject.org/materials/mp-5966
8	mp-754329	CdSnO3	self	R-3	2	2018-01-02	0			0.976	1.0369	2.5448	2.6057	1020.41		O vacancies	flux single crystal growth	Shannon, R. D., Gillson, J. L., & Bouchard, R. J. (1977). Single crystal synthesis and electrical properties of CdSnO3, Cd2SnO4, In2TeO6 and Cdln2O4. Journal of Physics and Chemistry of Solids, 38(8), 877-881.	http://www.sciencedirect.com/science/article/pii/0022369777901263						0.228635	0.228635	n	1.175	1.09854	1.30523	no	https://materialsproject.org/materials/mp-754329
9	mp-19803	CdIn2O4	Sn, self	Fd-3m	20	2018-10-20	0	3	3.3	0.9137	1.0035	2.3567	2.4465	4347.83	6.1e+20	self-doped (O vacancies, interstitial metals)	RF sputtering	Wu, X., Coutts, T. J., & Mulligan, W. P. (1997). Properties of transparent conducting oxides formed from CdO and ZnO alloyed with SnO 2 and In 2 O 3. Journal of Vacuum Science & Technology A: Vacuum, Surfaces, and Films, 15(3), 1057-1062.	http://avs.scitation.org/doi/pdf/10.1116/1.580429	57	self-doped (O vacancies, interstitial metals)	DC reactive sputtering	Budzyńska, K., Leja, E., & Skrzypek, S. (1985). Transparent conductive CdIn2O4 thin films prepared by dc reactive sputtering. Solar energy materials, 12(1), 57-68.	http://www.sciencedirect.com/science/article/pii/0165163385900243	0.234535	0.234535	n	1.148	1.06188	1.31321	no	https://materialsproject.org/materials/mp-19803
10	mp-13334	ZnSnO3	self	R3c	16	2018-10-20	0.0411678			1.0767	1.0767	2.7431	2.7431	250	4e+19	self-doped (O non-stoichiometry)	RF magnetron sputtering	T. Minami, H. Sonohara, S. Takata, and H. Sato, Jpn. J. Appl. Phys., Part 2: Lett. 33 (1994) p. L1963	http://iopscience.iop.org/article/10.1143/JJAP.33.L1693/meta	40	self-doped (O non-stoichiometry)	RF magnetron sputtering	T. Minami, H. Sonohara, S. Takata, and H. Sato, Jpn. J. Appl. Phys., Part 2: Lett. 33 (1994) p. L1963	http://iopscience.iop.org/article/10.1143/JJAP.33.L1693/meta	0.247644	0.247644	n	1.082	1.01415	1.25035	min 2VB	https://materialsproject.org/materials/mp-13334
11	mp-35493	Zn2SnO4	self O	Imma	53	50-100	0.016355	3.35	3.89	0.825	0.825	2.5578	2.5578	1200	5e+20	O vacancies (self doped)	RF magnetron sputtering	H. Enoki, T. Nakayama, and J. Echigoya, Phys. Status Solidi A 129 (1992) p. 181.	http://onlinelibrary.wiley.com/doi/10.1002/pssa.2211290116/full	26	O vacancies (self doped)	RF magnetron sputtering	Coutts, T. J., Young, D. L., Li, X., Mulligan, W. P., & Wu, X. (2000). Search for improved transparent conducting oxides: a fundamental investigation of CdO, Cd 2 SnO 4, and Zn 2 SnO 4. Journal of Vacuum Science & Technology A: Vacuum, Surfaces, and Films, 18(6), 2646-2660.	http://avs.scitation.org/doi/pdf/10.1116/1.1290371	0.266063	0.266063	n	0.992	0.934464	1.12722	no	https://materialsproject.org/materials/mp-35493
12	mp-8098	InGaO3	ZnO-doped, Sn, Ge, self (Ga/In)	P6_3/mmc	6	2018-05-10	0.00146463	3.3	3.4	1.342	1.5711	2.9776	3.19	400	4e+20	Ga, In off-stoichiometry	RF/DC sputtering	Minami, T. (1999). Transparent and conductive multicomponent oxide films prepared by magnetron sputtering. Journal of Vacuum Science & Technology A: Vacuum, Surfaces, and Films, 17(4), 1765-1772.	http://avs.scitation.org/doi/abs/10.1116/1.581888	10	undoped, Ga/Sn doped		J.M. Phillips, J. Kwo, G.A. Thomas, S.A. Carter, R.J. Cava, S.Y. Hou, J.J. Krajewski, J.H. Marshall, W.F. Peck, D.H. Rapkine, and R.B. van Dover, Appl. Phys. Lett. 65 (1994) p. 115.	http://aip.scitation.org/doi/abs/10.1063/1.113052	0.235933	0.235933	n	1.117	1.0871	1.16664	no	https://materialsproject.org/materials/mp-8098
13	mp-7831	MgIn2O4	V_O, self, H, Li	Fd-3m	17	2018-10-20	0.0282423	3.4	3.5	1.838	1.838	3.3296	3.3296	232.558	6.3e+20	self-doped	RF/DC sputtering	Minami, T. (1999). Transparent and conductive multicomponent oxide films prepared by magnetron sputtering. Journal of Vacuum Science & Technology A: Vacuum, Surfaces, and Films, 17(4), 1765-1772.	http://avs.scitation.org/doi/abs/10.1116/1.581888	14	O vacancies (self doped)	PLD	Noshiro, R., Ueda, K., Hosono, H., & Kawazoe, H. (2000). Fabrication of MgIn 2 O 4 Thin Films With Low Resistivity on MgO (100) Surface by PLD Method. MRS Online Proceedings Library Archive, 623.	https://www.cambridge.org/core/journals/mrs-online-proceedings-library-archive/article/fabrication-of-mgin2o4-thin-films-with-low-resistivity-on-mgo-100-surface-by-pld-method/ACE2EA8FA404125033A01043AD99EF2D	0.297973	0.297973	n	0.902	0.902078	1.24166	min 3VB	https://materialsproject.org/materials/mp-7831
14	mp-770218	ZnIn2O4	undoped	Pnma	3	2018-03-05	0.0709017	3.5	3.5	0.4847	0.5661	1.9277	2.0091	1265.82	4.6e+20	self-doped	PLD	Rougier, A., Naghavi, N., Marcel, C., Portemer, F., Dupont, L., Guéry, C., & Tarascon, J. M. (1998). Characterization of Transparent Conducting Pulsed Laser Deposited Films in the Indium Zinc Oxide System. MRS Online Proceedings Library Archive, 547.	https://www.cambridge.org/core/services/aop-cambridge-core/content/view/3B9E8D693DA876C10281C94D53C7DF1E/S1946427400358171a.pdf/characterization_of_transparent_conducting_pulsed_laser_deposited_films_in_the_indium_zinc_oxide_system.pdf	26	self-doped	PLD	Rougier, A., Naghavi, N., Marcel, C., Portemer, F., Dupont, L., Guéry, C., & Tarascon, J. M. (1998). Characterization of Transparent Conducting Pulsed Laser Deposited Films in the Indium Zinc Oxide System. MRS Online Proceedings Library Archive, 547.	https://www.cambridge.org/core/services/aop-cambridge-core/content/view/3B9E8D693DA876C10281C94D53C7DF1E/S1946427400358171a.pdf/characterization_of_transparent_conducting_pulsed_laser_deposited_films_in_the_indium_zinc_oxide_system.pdf	0.243843	0.243843	n	1.089	0.981779	1.19076	min 2VB	https://materialsproject.org/materials/mp-770218
15	mp-1094040	Zn2In2O5	self (In)	P6_3mc	5	2018-03-05	0.0842254	2.9	3.43	0.5559	0.5559	1.9666	1.9666	3448.28	6e+20	off-stoichiometry	DC magnetron sputtering	Minami, T., Kakumu, T., Takeda, Y., & Takata, S. (1996). Highly transparent and conductive ZnO In2O3 thin films prepared by dc magnetron sputtering. Thin Solid Films, 290, 1-5.	http://www.sciencedirect.com/science/article/pii/S0040609096090943	32	off-stoichiometry	DC magnetron sputtering	Minami, T., Kakumu, T., Takeda, Y., & Takata, S. (1996). Highly transparent and conductive ZnO In2O3 thin films prepared by dc magnetron sputtering. Thin Solid Films, 290, 1-5.	http://www.sciencedirect.com/science/article/pii/S0040609096090943	0.257	0.257	n	1.326	1.31767	1.37081	no	https://materialsproject.org/materials/mp-1094040
16	mp-682284	Zn3In2O6	undoped	P1	3	2018-03-05	0.0366282	2.8	3.44	0.6833	0.6843	2.2094	2.2104	1300	4.27632e+20	self-doped	PLD	Rougier, A., Naghavi, N., Marcel, C., Portemer, F., Dupont, L., Guéry, C., & Tarascon, J. M. (1998). Characterization of Transparent Conducting Pulsed Laser Deposited Films in the Indium Zinc Oxide System. MRS Online Proceedings Library Archive, 547.	https://www.cambridge.org/core/services/aop-cambridge-core/content/view/3B9E8D693DA876C10281C94D53C7DF1E/S1946427400358171a.pdf/characterization_of_transparent_conducting_pulsed_laser_deposited_films_in_the_indium_zinc_oxide_system.pdf	19	self-doped	PLD	Rougier, A., Naghavi, N., Marcel, C., Portemer, F., Dupont, L., Guéry, C., & Tarascon, J. M. (1998). Characterization of Transparent Conducting Pulsed Laser Deposited Films in the Indium Zinc Oxide System. MRS Online Proceedings Library Archive, 547.	https://www.cambridge.org/core/services/aop-cambridge-core/content/view/3B9E8D693DA876C10281C94D53C7DF1E/S1946427400358171a.pdf/characterization_of_transparent_conducting_pulsed_laser_deposited_films_in_the_indium_zinc_oxide_system.pdf	0.243763	0.243763	n	0.899313	0.803603	1.04487	no	https://materialsproject.org/materials/mp-682284
17	mp-3163	BaSnO3	La, Gd	Pm-3m	30	20-50	0	3.1	3.4	0.3666	0.8911	2.0013	2.4748	4928	4.4e+20	La	PLD (epitaxial)	Kim, H.J., Kim, U., Kim, H.M., Kim, T.H., Mun, H.S., Jeon, B.G., Hong, K.T., Lee, W.J., Ju, C., Kim, K.H. and Char, K., 2012. High mobility in a stable transparent perovskite oxide. Applied Physics Express, 5(6), p.061102.	http://iopscience.iop.org/article/10.1143/APEX.5.061102/meta	320	La	PLD (epitaxial)	Kim, H.J., Kim, U., Kim, H.M., Kim, T.H., Mun, H.S., Jeon, B.G., Hong, K.T., Lee, W.J., Ju, C., Kim, K.H. and Char, K., 2012. High mobility in a stable transparent perovskite oxide. Applied Physics Express, 5(6), p.061102.	http://iopscience.iop.org/article/10.1143/APEX.5.061102/meta	0.207811	0.207811	n(p)	1.58855	1.58855	2.13157	min 3VB	https://materialsproject.org/materials/mp-3163
18	mp-2879	SrSnO3	Sb, Nd, Fe, Ta	Pnma	5	2018-03-05	0	4.06	4.63	1.737	1.8022	3.1501	3.2153	47.619	2.85e+21	Nd	PLD (epitaxial)	Liu, Q., Dai, J., Zhang, X., Zhu, G., Liu, Z., & Ding, G. (2011). Perovskite-type transparent and conductive oxide films: Sb-and Nd-doped SrSnO 3. Thin Solid Films, 519(18), 6059-6063.	http://www.sciencedirect.com/science/article/pii/S0040609011006845	0.329	Nd	PLD (epitaxial)	Liu, Q., Dai, J., Zhang, X., Zhu, G., Liu, Z., & Ding, G. (2011). Perovskite-type transparent and conductive oxide films: Sb-and Nd-doped SrSnO 3. Thin Solid Films, 519(18), 6059-6063.	http://www.sciencedirect.com/science/article/pii/S0040609011006845	0.431134	0.431134	n	0.848	0.807811	0.977483	min 2VB	https://materialsproject.org/materials/mp-2879
19	mp-5229	SrTiO3	La, La/O, Sb	Pm-3m	49	20-50	0.000934943	3.1	3.5	2.1034	2.1034	3.1899	3.5555	217.501	3.3e+20	La	molecular beam epitaxy	Choi, M., Posadas, A. B., Rodriguez, C. A., O'Hara, A., Seinige, H., Kellock, A. J., ... & Demkov, A. A. (2014). Structural, optical, and electrical properties of strained La-doped SrTiO3 films. Journal of Applied Physics, 116(4), 043705.	http://aip.scitation.org/doi/pdf/10.1063/1.4891225	3	Sb	PLD (epitaxial)	Wang, H. H., Cui, D. F., Dai, S. Y., Lu, H. B., Zhou, Y. L., Chen, Z. H., & Yang, G. Z. (2001). Optical and transport properties of Sb-doped SrTiO 3 thin films. Journal of Applied Physics, 90(9), 4664-4667.	http://aip.scitation.org/doi/10.1063/1.1408596	0.685322	0.685322	n(p)	0.471417	0.471417	0.490526	min 3VB 3CB	https://materialsproject.org/materials/mp-5229
20	mp-504908	In2TeO6	V_O, Re	P321	2	2018-01-02	0	2.93	2.93	1.005	1.0153	2.6795	2.6898	50		Re	flux single crystal growth	Shannon, R. D., Gillson, J. L., & Bouchard, R. J. (1977). Single crystal synthesis and electrical properties of CdSnO3, Cd2SnO4, In2TeO6 and Cdln2O4. Journal of Physics and Chemistry of Solids, 38(8), 877-881.	http://www.sciencedirect.com/science/article/pii/0022369777901263						0.253057	0.253057	n	0.885	0.859262	0.990717	no	https://materialsproject.org/materials/mp-504908
21	mp-14243	Cd3TeO6	V_O, In	P2_1/c	3	2018-03-05	0	2.8	3.9	0.449	0.449	2.0734	2.0734	52.6316	4.83746e+19	O vacancies	RF magnetron sputtering	Tetsuka, H., Shan, Y. J., Tezuka, K., Imoto, H., & Wasa, K. (2006). Transparent conductive Cd 3 TeO 6 thin films with perovskite structure. Journal of Vacuum Science & Technology A: Vacuum, Surfaces, and Films, 24(2), L4-L6.	http://avs.scitation.org/doi/abs/10.1116/1.2172950	6.8	O vacancies	RF magnetron sputtering	Tetsuka, H., Shan, Y. J., Tezuka, K., Imoto, H., & Wasa, K. (2006). Transparent conductive Cd 3 TeO 6 thin films with perovskite structure. Journal of Vacuum Science & Technology A: Vacuum, Surfaces, and Films, 24(2), L4-L6.	http://avs.scitation.org/doi/abs/10.1116/1.2172950	0.231702	0.231702	n	1.083	1.03818	1.27197	no	https://materialsproject.org/materials/mp-14243
22	mp-5794	ZnGa2O4	V_O	Fd-3m	22	20-50	0	4	5	2.31	2.5	4.0462	4.2362	30		O vacancies	sintering, single crystal	Omata, T., Ueda, N., Ueda, K., & Kawazoe, H. (1994). New ultraviolet‐transport electroconductive oxide, ZnGa2O4 spinel. Applied physics letters, 64(9), 1077-1078.	http://aip.scitation.org/doi/abs/10.1063/1.110937						0.276071	0.276071	n	0.878	0.833415	0.954931	no	https://materialsproject.org/materials/mp-5794
23	mp-3443	CdGa2O4	V_O	Fd-3m	1	2018-01-02	0	3.5	3.96	1.579	1.671	3.1347	3.2267	120	1e+19	O vacancies	sintering, single crystal	Omata, T., Ueda, N., Hikuma, N., Ueda, K., Mizoguchi, H., Hashimoto, T., & Kawazoe, H. (1993). New oxide phase with wide band gap and high electroconductivity CdGa2O4 spinel. Applied physics letters, 62(5), 499-500.	http://aip.scitation.org/doi/pdf/10.1063/1.108891	75	O vacancies	sintering, single crystal	Omata, T., Ueda, N., Hikuma, N., Ueda, K., Mizoguchi, H., Hashimoto, T., & Kawazoe, H. (1993). New oxide phase with wide band gap and high electroconductivity CdGa2O4 spinel. Applied physics letters, 62(5), 499-500.	http://aip.scitation.org/doi/pdf/10.1063/1.108891	0.257077	0.257077	n	0.982	0.920553	1.09802	no	https://materialsproject.org/materials/mp-3443
24	mp-8922	CdSb2O6	Y	P-31m	1	2018-01-02	0	4.1	4.1	1.4136	1.7346	3.1809	3.4261	2.7		Y	Sintering	Yanagawa, K., Ohki, Y., Ueda, N., Omata, T., Hashimoto, T., & Kawazoe, H. (1993). New oxide phase Cd1− x Y x Sb2O6 with a wide band gap and high electrical conductivity. Applied physics letters, 63(24), 3335-3337.	http://aip.scitation.org/doi/abs/10.1063/1.110162						0.284501	0.284501	n	0.956	0.902955	1.10112	no	https://materialsproject.org/materials/mp-8922
25	mp-752467	NbO2F	undoped	Cc	1	2018-01-02	0	3.1	3.1	2.207	2.2591	3.5743	3.6264	0.006		Pt	Sintering	Mizoguchi, H., Orita, M., Hirano, M., Fujitsu, S., Takeuchi, T., & Hosono, H. (2002). NbO 2 F: An oxyfluoride phase with wide band gap and electrochromic properties. Applied physics letters, 80(25), 4732-4734.	http://aip.scitation.org/doi/abs/10.1063/1.1489703						15.7962	9.27891	n	0.545	0.521597	0.602236	no	https://materialsproject.org/materials/mp-752467
26	mp-30247	Mg(OH)2	C, undoped	P-3m1	6	2018-05-10	0			4.1797	4.1797	6.0086	6.0086	0.3		C	Sputtering	Honjo, T., Chiba, M., & Kuji, T. (2009). Novel Rare-Elements Free Transparent Conductor of Mg (OH) 2-C Compounds. e-Journal of Surface Science and Nanotechnology, 7, 791-794.	https://www.jstage.jst.go.jp/article/ejssnt/7/0/7_0_791/_article/-char/ja/						0.480099	0.480099	n(p)	0.762	0.560762	0.892633	no	https://materialsproject.org/materials/mp-30247
27	mp-530149	Ca12Al14O33	undoped	I-4	13	2018-10-20	0.00605269	5.9	5.9	1.974	1.974	3.1219	3.1219	1280	2e+21	Ti	Czochralski crystal growth/thermal annealing	Kim, S. W., Matsuishi, S., Nomura, T., Kubota, Y., Takata, M., Hayashi, K., ... & Hosono, H. (2007). Metallic State in a Lime− Alumina Compound with Nanoporous Structure. Nano letters, 7(5), 1138-1143.	http://pubs.acs.org/doi/pdf/10.1021/nl062717b	4	Ti	Czochralski crystal growth/thermal annealing	Kim, S. W., Matsuishi, S., Nomura, T., Kubota, Y., Takata, M., Hayashi, K., ... & Hosono, H. (2007). Metallic State in a Lime− Alumina Compound with Nanoporous Structure. Nano letters, 7(5), 1138-1143.	http://pubs.acs.org/doi/pdf/10.1021/nl062717b	0.539695	0.539695	n	0.532	0.491293	0.689272	no	https://materialsproject.org/materials/mp-530149
28	mp-1094063	Sr12Al14O33	undoped	I-4	2	2018-01-02	0.002			1.5838	1.5838	2.7501	2.7501	270	1.5e+21	Ti	PLD+annealing	Miyakawa, M., Ueda, N., Kamiya, T., Hirano, M., & Hosono, H. (2007). Novel Room Temperature Stable Electride 12SrO• 7Al2O3 Thin Films: Fabrication, Optical and Electron Transport Properties. Journal of the Ceramic Society of Japan, 115(1345), 567-570.	https://www.jstage.jst.go.jp/article/jcersj2/115/1345/115_1345_567/_pdf/-char/ja	1	Ti	PLD+annealing	Miyakawa, M., Ueda, N., Kamiya, T., Hirano, M., & Hosono, H. (2007). Novel Room Temperature Stable Electride 12SrO• 7Al2O3 Thin Films: Fabrication, Optical and Electron Transport Properties. Journal of the Ceramic Society of Japan, 115(1345), 567-570.	https://www.jstage.jst.go.jp/article/jcersj2/115/1345/115_1345_567/_pdf/-char/ja	0.068	0.068	n	0.532363	0.424782	0.701968	min 2VB	https://materialsproject.org/materials/mp-1094063/
29	mp-673669	In4Sn3O12	self, Sb	P-1	6	2018-05-10	0.0396213	3.5	3.75	0.889	0.9191	2.3805	2.4106	5000	1.5625e+21	self-doped	DC sputtering	Minami, T., Takeda, Y., Takata, S., & Kakumu, T. (1997). Preparation of transparent conducting In 4 Sn 3 O 12 thin films by DC magnetron sputtering. Thin Solid Films, 308, 13-18.	http://www.sciencedirect.com/science/article/pii/S0040609097005300	20	self-doped	DC sputtering	Minami, T., Takeda, Y., Takata, S., & Kakumu, T. (1997). Preparation of transparent conducting In 4 Sn 3 O 12 thin films by DC magnetron sputtering. Thin Solid Films, 308, 13-18.	http://www.sciencedirect.com/science/article/pii/S0040609097005300	0.229934	0.229934	n	0.969	0.894726	1.09365	no	https://materialsproject.org/materials/mp-673669

## Sheet: p-type TCs
Material			Structure and composition		Counting studies		Stability	Transparency						Transport															Dopability				Other
#	MP task ID	p pretty formula	common dopants	space group symbol	Number of studies (google scholar)	Number of studies (range)	Energy above hull	Minimum experimental gap (eV)	Maximum experimental gap (eV)	PBE band gap (eV)	PBE direct gap (eV)	HSE06 band gap (eV)	HSE06 direct gap (eV)	Max conductivity (S/cm)	Associated carrier concentration (cm^-3)	Max conductivity dopant	Max conductivity synthesis	Max conductivity reference	Max conductivity link	Max mobility (cm2/Vs)	Max mobility dopant	Max mobility synthesis	Max mobility processing temperature (K)	Max mobility reference	Max mobility link	m* avg (10^20 cm^-3, 300 K)	m* planar (10^20 cm^-3, 300 K)	dopant	BPE ratio for VB:CB = 4:2	BPE min ratio (use for lower error bar and p screening)	BPE max ratio (use for upper error bar and n screening)	Degenerate bands?	MP link
1	mp-3748	AlCuO2	O self	R-3m	159	100-500	9.44e-05	1.8	3.5	1.7978	2.6105	3.3512	4.1189	5	1.2e+18	O self doped	DC sputtering	Banerjee, A.N., Ghosh, C.K. & Chattopadhyay, K.K., 2005. Effect of excess oxygen on the electrical properties of transparent p-type conducting CuAlO thin films. Solar Energy Materials and Solar Cells, 89(1), pp.75–83.	http://www.sciencedirect.com/science/article/pii/S0927024805000164	24	O self doped	DC sputtering		Banerjee, A.N., Ghosh, C.K. & Chattopadhyay, K.K., 2005. Effect of excess oxygen on the electrical properties of transparent p-type conducting CuAlO thin films. Solar Energy Materials and Solar Cells, 89(1), pp.75–83.	http://www.sciencedirect.com/science/article/pii/S0927024805000164	3.02928	1.95652	p	0.733	0.583003	1.03014	no	https://materialsproject.org/materials/mp-3748
2	mp-1096940	BCuO2	O self	R-3m	11	2018-10-20	0.63684	2.2	3.6	1.4808	2.0709	3.0723	3.3882	1.65	8.68e+16	O self doped	PLD	Snure M and Tiwari A 2007 Appl. Phys. Lett. 91 092123/1	http://aip.scitation.org/doi/abs/10.1063/1.2778755	100	O self doped	PLD		Snure M and Tiwari A 2007 Appl. Phys. Lett. 91 092123/1	http://aip.scitation.org/doi/abs/10.1063/1.2778755	1.32933	1.27706	p	-0.49	-5.6	7.171	no but huge range	https://materialsproject.org/materials/mp-1096940/
3	mp-510625	CrCuO2	Mg, S, V_Cu	R-3m	77	50-100	0	2.75	3.48	1.665	2.1985	2.8072	3.4701	220	1.25e+22	Mg	RF sputtering	Nagarajan, R. et al., 2001. p-type conductivity in CuCr1-xMgxO2 films and powders. Journal of Applied Physics, 89(12), pp.8022–8025.	http://dx.doi.org/10.1063/1.1372636	0.1	Mg, S	Sintering		Mandal, P. et al., 2016. A scheme of simultaneous cationic–anionic substitution in CuCrO 2 for transparent and superior p -type transport. Journal of Physics D: Applied Physics, 49(27), p.275109.	http://iopscience.iop.org/article/10.1088/0022-3727/49/27/275109/meta	7.9779	2.86377	p	0.44	0.44	0.804	no	https://materialsproject.org/materials/mp-510625
4	mp-510281	FeCuO2	Pt	R-3m	35	20-50	0	1.55	3.45	0.8044	0.8568	1.524	1.524	12.5	1.2e+22	Pt	Solid state reaction	Ruttanapun, C., Prachamon, W. & Wichainchai, A., 2012. Optoelectronic properties of Cu1−xPtxFeO2 (0 ≤ x ≤ 0.05) delafossite for p-type transparent conducting oxide. Current Applied Physics, 12(1), pp.166–170.	http://linkinghub.elsevier.com/retrieve/pii/S1567173911003026	0.006	Pt	Solid state reaction		Ruttanapun, C., Prachamon, W. & Wichainchai, A., 2012. Optoelectronic properties of Cu1−xPtxFeO2 (0 ≤ x ≤ 0.05) delafossite for p-type transparent conducting oxide. Current Applied Physics, 12(1), pp.166–170.	http://linkinghub.elsevier.com/retrieve/pii/S1567173911003026	2.19955	1.45413	p	0.209	-0.004	0.469	no	https://materialsproject.org/materials/mp-510281
5	mp-4280	GaCuO2	Cr, O	R-3m	38	20-50	0	3.1	3.6	0.7287	1.4798	2.2434	3.5471	0.071	1730000000000000	Cr (really, an alloy with CrCuO2)	Sol gel	Han, M. et al., 2012. Structural, electronic band transition and optoelectronic properties of delafossite CuGa1−xCrxO2 (0 ≤ x ≤ 1) solid solution films grown by the sol–gel method. Journal of Materials Chemistry, 22(35), p.18463.	http://pubs.rsc.org/en/content/articlehtml/2012/jm/c2jm33027j	16.3	Cr (really, an alloy with CrCuO2)	Sol gel		Han, M. et al., 2012. Structural, electronic band transition and optoelectronic properties of delafossite CuGa1−xCrxO2 (0 ≤ x ≤ 1) solid solution films grown by the sol–gel method. Journal of Materials Chemistry, 22(35), p.18463.	http://pubs.rsc.org/en/content/articlehtml/2012/jm/c2jm33027j	2.555	1.81767	p	0.898	0.78819	1.26499	no	https://materialsproject.org/materials/mp-4280
6	mp-4636	ScCuO2	Mg, O	R-3m	12	2018-10-20	0.000307108	3.6	3.6	2.3905	2.3905	3.6361	3.69	30	1.5e+20	O self doped	Sputtering	Duan, N. et al., 2000. Transparent p-type conducting CuScO[sub 2+x] films. Applied Physics Letters, 77(9), p.1325.	http://dx.doi.org/10.1063/1.1289906	0.5	Mg, O	RF sputtering		Yanagi, H. et al., 2003. P-type conductivity in transparent oxides and sulfide fluorides. Journal of Solid State Chemistry, 175(1), pp.34–38.	http://www.sciencedirect.com/science/article/pii/S0022459603000951	2.64988	1.80398	p	0.421236	0.430938	0.539418	no	https://materialsproject.org/materials/mp-4636
7	mp-3642	ScCuO2	Mg, O	P6_3/mmc	12	2018-10-20	0	3.3	3.3	2.3309	2.3309	3.2367	3.2367	30	1.5e+20	O self doped	Sputtering	Duan, N. et al., 2000. Transparent p-type conducting CuScO[sub 2+x] films. Applied Physics Letters, 77(9), p.1325.	http://dx.doi.org/10.1063/1.1289906	0.5	Mg, O	RF sputtering		Yanagi, H. et al., 2003. P-type conductivity in transparent oxides and sulfide fluorides. Journal of Solid State Chemistry, 175(1), pp.34–38.	http://www.sciencedirect.com/science/article/pii/S0022459603000951	4.62191	2.48801	p	0.475	0.48594	0.5964	no	https://materialsproject.org/materials/mp-3642
8	mp-6972	YCuO2	Ca	R-3m	9	2018-05-10	0.00110009	3.15	3.5	2.6307	2.6896	4.0562	4.4023	8		Ca	Sputtering	Manoj, R. et al., 2008. Effect of oxygen intercalation on properties of sputtered CuYO 2 for potential use as p -type transparent conducting films. , 31(1), pp.49–53.	https://link.springer.com/article/10.1007/s12034-008-0009-1							3.04904	2.66108	p	0.475	0.48594	0.5964	no	https://materialsproject.org/materials/mp-6972
9	mp-2918	YCuO2	Ca	P6_3/mmc	9	2018-05-10	0.000309721	3.15	3.5	2.647	2.649	3.9779	4.0843	8		Ca	Sputtering	Manoj, R. et al., 2008. Effect of oxygen intercalation on properties of sputtered CuYO 2 for potential use as p -type transparent conducting films. , 31(1), pp.49–53.	https://link.springer.com/article/10.1007/s12034-008-0009-1							4.1578	3.3518	p	0.491	0.489371	0.554867	no	https://materialsproject.org/materials/mp-2918
10	mp-1096971	AgGaO2	self	R-3m	4	2018-03-05	8.66e-05	2.4	4.4	0.5563	1.6422	1.9126	3.1539	0.00032		self-doped	Pulsed laser deposition	Vanaja, K. A., Ajimsha, R. S., Asha, A. S., & Jayaraj, M. K. (2006). p-type electrical conduction in α-Ag Ga O 2 delafossite thin films. Applied physics letters, 88(21), 212103.	http://aip.scitation.org/doi/abs/10.1063/1.2204757							1.14812	1.11462	p	1.06656	0.92006	1.54409	no	https://materialsproject.org/materials/mp-1096971/
11	mp-766791	ZnCo2O4	self (off-stoichiometry)	Fd-3m	7	2018-05-10	0.128787	2.26	2.8	0	0	1.4352	1.4352	8.1	1.8e+21	cation off-stoichiometry	Combinatorial RF co-sputtering	Perkins, J.D., Paudel, T.R., Zakutayev, A., Ndione, P.F., Parilla, P.A., Young, D.L., Lany, S., Ginley, D.S., Zunger, A., Perry, N.H. and Tang, Y., 2011. Inverse design approach to hole doping in ternary oxides: Enhancing p-type conductivity in cobalt oxide spinels. Physical Review B, 84(20), p.205207.	https://journals.aps.org/prb/pdf/10.1103/PhysRevB.84.205207	0.028	cation off-stoichiometry	Combinatorial RF co-sputtering		Perkins, J.D., Paudel, T.R., Zakutayev, A., Ndione, P.F., Parilla, P.A., Young, D.L., Lany, S., Ginley, D.S., Zunger, A., Perry, N.H. and Tang, Y., 2011. Inverse design approach to hole doping in ternary oxides: Enhancing p-type conductivity in cobalt oxide spinels. Physical Review B, 84(20), p.205207.	https://journals.aps.org/prb/pdf/10.1103/PhysRevB.84.205207	6.99628	6.99628	p	0.476976	0.442057	0.638237	no	https://materialsproject.org/materials/mp-766791
12	mp-1094005	ZnIr2O4	self	Fd-3m	3	2018-03-05	0.2668	2.97	2.97	0.5858	0.6979	2.2224	2.4381	3.5		O self doped	PLD	M. Dekkers, G. Rijnders, and D.H.A. Blank: ZnIr2O4, a p-type transparent oxide semiconductor in the class of spinel zinc-d6-transition metal oxide. Appl. Phys. Lett. 90, 021903 (2007)	http://aip.scitation.org/doi/pdf/10.1063/1.2431548							7.32737	7.32737	p	0.647823	0.638465	0.726414	2VB min	https://materialsproject.org/materials/mp-1094005/
13	mp-5146	ZnRh2O4	self	Fd-3m	4	2018-03-05	0	2.1	2.74	0.9324	0.9375	2.8019	2.8084	0.7		undoped		Mizoguchi, H., Hirano, M., Fujitsu, S., Takeuchi, T., Ueda, K. and Hosono, H., 2002. ZnRh 2 O 4: A p-type semiconducting oxide with a valence band composed of a low spin state of Rh 3+ in a 4d 6 configuration. Applied physics letters, 80(7), pp.1207-1209.	http://dx.doi.org/10.1063/1.1450252							3.35716	3.35716	p	0.578351	0.571706	0.631875	2VB min	https://materialsproject.org/materials/mp-5146
14	mp-541022	Cr2MnO4	Li	Fd-3m	2	2018-01-02	0	3.2	3.2	2.3724	2.4786	3.6148	3.7227	0.035		Li	RF co-sputtering	Peng, H., Zakutayev, A., Lany, S., Paudel, T.R., d'Avezac, M., Ndione, P.F., Perkins, J.D., Ginley, D.S., Nagaraja, A.R., Perry, N.H. and Mason, T.O., 2013. Li‐Doped Cr2MnO4: A New p‐Type Transparent Conducting Oxide by Computational Materials Design. Advanced Functional Materials, 23(42), pp.5267-5276.	http://onlinelibrary.wiley.com/doi/10.1002/adfm.201300807/full							0.997744	0.997744		0.550871	0.532943	0.585761	no	https://materialsproject.org/materials/mp-541022
15	mp-19399	Cr2O3	Mg/N, Mg, self	R-3c	11	2018-10-20	0	3.1	3.4	2.4365	2.4365	3.7875	3.9064	0.33		Mg, N (co-doped)	PLD	Arca, E., Fleischer, K., & Shvets, I. V. (2011). Magnesium, nitrogen codoped Cr2O3: A p-type transparent conducting oxide. Applied Physics Letters, 99(11), 111910.	http://aip.scitation.org/doi/abs/10.1063/1.3638461							3.6199	3.42578		0.499646	0.49044	0.518034	no	https://materialsproject.org/materials/mp-19399
16	mp-5229	SrTiO3	In	Pm-3m	26	20-50	0.000934943	3.2	3.2	1.8218	2.1125	3.1899	3.5555	25	1.8e+21	In	Hybrid PLD-MBE	Huang, W. et al., 2016. Electrical and Optical Properties of Transparent Conducting p -Type SrTiO 3 Thin Films G. Brennecka, ed. Journal of the American Ceramic Society, 99(1), pp.226–233. Available at: http://doi.wiley.com/10.1111/jace.13949	http://doi.wiley.com/10.1111/jace.13949	0.028	In	Hybrid PLD-MBE		Huang, W. et al., 2016. Electrical and Optical Properties of Transparent Conducting p -Type SrTiO 3 Thin Films G. Brennecka, ed. Journal of the American Ceramic Society, 99(1), pp.226–233. Available at: http://doi.wiley.com/10.1111/jace.13949	http://doi.wiley.com/10.1111/jace.13949	1.91529	1.91529	n(p)	0.471417	0.471417	0.490526	3VB 3CB min	https://materialsproject.org/materials/mp-5229
17	n/a	LaCrO3	Sr, SrCrO3	Pbnm	2	2018-01-02	0.00125317	2	2.3	2.1552	2.1558	3.4048	3.4118	54	3.4e+21	SrCrO3	Molecular beam epitaxy	Zhang, K.H.L. et al., 2015. Perovskite Sr-Doped LaCrO3 as a New p-Type Transparent Conducting Oxide. Advanced materials (Deerfield Beach, Fla.), 27(35), pp.5191–5	http://onlinelibrary.wiley.com/doi/10.1002/adma.201501959/full	0.027	Sr	Molecular beam epitaxy		Zhang, K.H.L. et al., 2015. Perovskite Sr-Doped LaCrO3 as a New p-Type Transparent Conducting Oxide. Advanced materials (Deerfield Beach, Fla.), 27(35), pp.5191–5	http://onlinelibrary.wiley.com/doi/10.1002/adma.201501959/full	2.61779	2.4747		0.520372	0.520372	0.566141	no	n/a
18	mp-2133	ZnO	N, Ni/In, Al/Cu2O	P6_3mc	99	50-100	0	3.25	3.5	0.7317	0.7317	2.4034	2.4034	144	3.2e+18	Al, Cu2O	Sol-gel	Hui, K.N. et al., 2013. Low resistivity p-type Zn1−xAlxO:Cu2O composite transparent conducting oxide thin film fabricated by sol–gel method. Materials Research Bulletin, 48(1), pp.96–100.	http://www.sciencedirect.com/science/article/pii/S0025540812007696	155	Ni, In	Ultrasonic spray pyrolysis		Bian, J.M. et al., 2004. Deposition and electrical properties of N–In codoped p-type ZnO films by ultrasonic spray pyrolysis. Applied Physics Letters, 84(4), p.541	http://scitation.aip.org/content/aip/journal/apl/84/4/10.1063/1.1644331	2.24532	1.89209	n(p)	1.24402	1.17086	1.69148	2VB min	https://materialsproject.org/materials/mp-2133
19	mp-510584	MoO3	In	Pnma	6	2018-05-10	0.0312559	1.7	3.8	1.9418	2.8101	2.5939	3.5334	167.224	5e+19	In	Tube furnace	Chen, H.-Y. et al., 2011. Indium-doped molybdenum oxide as a new p-type transparent conductive oxide. J. Mater. Chem., 21(15), pp.5745–5752.	http://dx.doi.org/10.1039/C0JM03815F	20.9	In	Tube furnace		Chen, H.-Y. et al., 2011. Indium-doped molybdenum oxide as a new p-type transparent conductive oxide. J. Mater. Chem., 21(15), pp.5745–5752.	http://dx.doi.org/10.1039/C0JM03815F	7.81835	1.50867	n(p)	0.592575	0.559625	0.608937	2VB min	https://materialsproject.org/materials/mp-510584
20	mp-856	SnO2	In, Sb, Al, Fe	P4_2/mnm	30	20-50	0	3.4	3.9	0.6519	0.6519	2.3692	2.3692	6.5	5.8e+19	Sb	DC reactive sputtering	Ji, Z. et al., 2008. Preparation of p-type transparent conducting tin-antimony oxide thin films by DC reactive magnetron sputtering. physica status solidi (c), 5(10), pp.3364–3367.	http://onlinelibrary.wiley.com/doi/10.1002/pssc.200778884/epdf	1	Sb	DC reactive sputtering		Ji, Z. et al., 2008. Preparation of p-type transparent conducting tin-antimony oxide thin films by DC reactive magnetron sputtering. physica status solidi (c), 5(10), pp.3364–3367.	http://onlinelibrary.wiley.com/doi/10.1002/pssc.200778884/epdf	1.75186	1.53027	n(p)	1.212	1.14515	1.46913	no	https://materialsproject.org/materials/mp-856
21	mp-13900	SrCu2O2	K	I4_1/amd	21	20-50	0	3.3	3.3	1.8083	1.8083	3.2367	3.2367	0.0483	6.1e+17	K		Kudo, A., Yanagi, H., Hosono, H. and Kawazoe, H., 1998. SrCu 2 O 2: a p-type conductive oxide with wide band gap. Applied Physics Letters, 73(2), pp.220-222.	http://aip.scitation.org/doi/abs/10.1063/1.121761	0.46	K	PLD		Kudo, A., Yanagi, H., Hosono, H. and Kawazoe, H., 1998. SrCu 2 O 2: a p-type conductive oxide with wide band gap. Applied Physics Letters, 73(2), pp.220-222.	http://aip.scitation.org/doi/abs/10.1063/1.121761	2.72509	1.4362	p	0.585	0.570179	0.702752	2VB min	https://materialsproject.org/materials/mp-13900
22	mp-23092	Ba2BiTaO6	self, K	R-3	2	2018-01-02	0.000279598	4.5	4.5	2.5855	2.6212	3.6713	3.7016	0.005	1040000000000000	K	PLD	Bhatia, A. et al., 2016. High-Mobility Bismuth-based Transparent p -Type Oxide from High-Throughput Material Screening. Chemistry of Materials, 28(1), pp.30–34.	http://pubs.acs.org/doi/full/10.1021/acs.chemmater.5b03794	30	K	PLD		Bhatia, A. et al., 2016. High-Mobility Bismuth-based Transparent p -Type Oxide from High-Throughput Material Screening. Chemistry of Materials, 28(1), pp.30–34.	http://pubs.acs.org/doi/full/10.1021/acs.chemmater.5b03794	0.477662	0.459537	p	0.391	0.380318	0.481742	no	https://materialsproject.org/materials/mp-23092
23	mp-556524	Sn2Nb2O7	self	Fd-3m	3	2018-03-05	0.0868251	2.3	2.64	0.8633	1.0764	1.4595	1.7116	0.00666667	2.5e+17	Sn2Ta2O7 (alloyed)	Tube furnace	Kikuchi, N., Samizo, A., Ikeda, S., Aiura, Y., Mibu, K., & Nishio, K. (2017). Carrier generation in a p-type oxide semiconductor: Sn 2 (Nb 2− x Ta x) O 7. Physical Review Materials, 1(2), 021601.	https://journals.aps.org/prmaterials/abstract/10.1103/PhysRevMaterials.1.021601	0.19	undoped	Tube furnace		Kikuchi, N., Samizo, A., Ikeda, S., Aiura, Y., Mibu, K., & Nishio, K. (2017). Carrier generation in a p-type oxide semiconductor: Sn 2 (Nb 2− x Ta x) O 7. Physical Review Materials, 1(2), 021601.	https://journals.aps.org/prmaterials/abstract/10.1103/PhysRevMaterials.1.021601	4.89617	4.89617	p(n)	0.349	-0.019887	0.620527	2VB 2CB min	https://materialsproject.org/materials/mp-556524
24	mp-3593	Sn2Ta2O7	self	Fd-3m	1	2018-01-02	0.0781014	3	3	1.4852	1.6222	2.2548	2.4133	0.0047619	7.5e+17	undoped	Tube furnace	Kikuchi, N., Samizo, A., Ikeda, S., Aiura, Y., Mibu, K., & Nishio, K. (2017). Carrier generation in a p-type oxide semiconductor: Sn 2 (Nb 2− x Ta x) O 7. Physical Review Materials, 1(2), 021601.	https://journals.aps.org/prmaterials/abstract/10.1103/PhysRevMaterials.1.021601	0.18	undoped	Tube furnace		Kikuchi, N., Samizo, A., Ikeda, S., Aiura, Y., Mibu, K., & Nishio, K. (2017). Carrier generation in a p-type oxide semiconductor: Sn 2 (Nb 2− x Ta x) O 7. Physical Review Materials, 1(2), 021601.	https://journals.aps.org/prmaterials/abstract/10.1103/PhysRevMaterials.1.021601	6.95104	6.95104	p(n)	0.385177	0.133108	0.567923	2VB 2CB min	https://materialsproject.org/materials/mp-3593
25	mp-1096877	Ca3Co4O9	self	Cmm2	3	2018-03-05	0.028			0.8915	1.0404	2.5562	2.5562	17.5		self-doped	Sol-gel, spin coating, and heat treatments	Aksit, M., Kolli, S.K., Slauch, I.M. and Robinson, R.D., 2014. Misfit layered Ca3Co4O9 as a high figure of merit p-type transparent conducting oxide film through solution processing. Applied Physics Letters, 104(16), p.161901.	http://dx.doi.org/10.1063/1.4871506							9.17248	8.61552		0.482161	0.470439	0.513877	no	https://materialsproject.org/materials/mp-1096877/
26	mp-560588	ZnS	Cu, Cu2S	P6_3mc	17	2018-10-20	0.00288076	2.4	3.9	2.0801	2.0801	3.3013	3.3013	1000	1.04e+22	Cu	Pulsed laser deposition	Woods-Robinson, R. et al., 2016. P-Type Transparent Cu-Alloyed ZnS Deposited at Room Temperature. Advanced Electronic Materials, 2(6).	http://onlinelibrary.wiley.com/doi/10.1002/aelm.201500396/abstract	1.43	Cu	Pulsed laser deposition		Woods-Robinson, R. et al., 2016. P-Type Transparent Cu-Alloyed ZnS Deposited at Room Temperature. Advanced Electronic Materials, 2(6).	http://onlinelibrary.wiley.com/doi/10.1002/aelm.201500396/abstract	1.25491	1.09581	n(p)	0.574	0.472576	0.784251	2VB min	https://materialsproject.org/materials/mp-560588
27	mp-10695	ZnS	Cu, Cu2S	F-43m	17	2018-10-20	0	2.4	3.7	2.0186	2.0186	3.2309	3.2309	1000	1.04e+22	Cu2S	Chemical bath deposition	Xu, X. et al., 2016. Chemical Bath Deposition of p-Type Transparent, Highly Conducting (CuS)x:(ZnS)1-x Nanocomposite Thin Films and Fabrication of Si Heterojunction Solar Cells. Nano letters, 16(3), pp.1925–32.	http://pubs.acs.org/doi/abs/10.1021/acs.nanolett.5b05124	1.43	Cu2S	Chemical bath deposition		Xu, X. et al., 2016. Chemical Bath Deposition of p-Type Transparent, Highly Conducting (CuS)x:(ZnS)1-x Nanocomposite Thin Films and Fabrication of Si Heterojunction Solar Cells. Nano letters, 16(3), pp.1925–32.	http://pubs.acs.org/doi/abs/10.1021/acs.nanolett.5b05124	0.794397	0.794397	n(p)	0.412	0.364956	0.642266	3VB min	https://materialsproject.org/materials/mp-10695
28	mp-4979	CuAlS2	Zn, self (Cu_Al, V_Al)	I-42d	6	2018-05-10	0	3.1	3.38	1.6937	1.6937	3.0633	3.0633	250	7.3e+19	Cu self-doped, Al deficient	Spark plasma sintering	Huang, F.-Q., Liu, M.-L. & Yang, C., 2011. Highly enhanced p-type electrical conduction in wide band gap Cu1+xAl1−xS2 polycrystals. Solar Energy Materials and Solar Cells, 95(10), pp.2924–2927.	http://www.sciencedirect.com/science/article/pii/S0927024811002881	21.2	Cu self-doped, Al deficient	Spark plasma sintering		Huang, F.-Q., Liu, M.-L. & Yang, C., 2011. Highly enhanced p-type electrical conduction in wide band gap Cu1+xAl1−xS2 polycrystals. Solar Energy Materials and Solar Cells, 95(10), pp.2924–2927.	http://www.sciencedirect.com/science/article/pii/S0927024811002881	1.63	1.53896	p(n)	0.583213	0.566403	0.694561	no	https://materialsproject.org/materials/mp-4979
29	mp-5970	BaCu2S2	self	Pnma	3	2018-03-05	0.0024018	2.25	2.35	0.9028	0.9028	2.0956	2.0956	53	5.8e+19	undoped	RF combinatorial co-sputtering	Han, Y., Siol, S., Zhang, Q., & Zakutayev, A. (2017). Optoelectronic properties of strontium and barium copper sulfides prepared by combinatorial sputtering. Chemistry of Materials, 29(19), 8239-8248.	http://pubs.acs.org/doi/abs/10.1021/acs.chemmater.7b02475	5.71	undoped	RF combinatorial co-sputtering		Han, Y., Siol, S., Zhang, Q., & Zakutayev, A. (2017). Optoelectronic properties of strontium and barium copper sulfides prepared by combinatorial sputtering. Chemistry of Materials, 29(19), 8239-8248.	http://pubs.acs.org/doi/abs/10.1021/acs.chemmater.7b02475	1.42776	0.98655	p	0.541209	0.508982	0.603395	no	https://materialsproject.org/materials/mp-5970
30	mp-10748	Cu3TaS4	self	P-43m	3	2018-03-05	0	2.7	3	1.9231	2.3373	2.9244	3.4132	1.6		undoped	Pulsed laser deposition + ex-situ sulfurization	Tate, J., Newhouse, P. F., Kykyneshi, R., Hersh, P. A., Kinney, J., McIntyre, D. H., & Keszler, D. A. (2008). Chalcogen-based transparent conductors. Thin Solid Films, 516(17), 5795-5799.	http://www.sciencedirect.com/science/article/pii/S0040609007016951#	0.2	undoped	Pulsed laser deposition + ex-situ sulfurization		Tate, J., Newhouse, P. F., Kykyneshi, R., Hersh, P. A., Kinney, J., McIntyre, D. H., & Keszler, D. A. (2008). Chalcogen-based transparent conductors. Thin Solid Films, 516(17), 5795-5799.	http://www.sciencedirect.com/science/article/pii/S0040609007016951#	1.00977	1.00977	p	0.435	0.385433	0.435	3VB min	https://materialsproject.org/materials/mp-10748
31	mp-4081	Cu3TaSe4	self	P-43m	2	2018-01-02	0	2.35	2.35	1.598	2.0308	2.4544	2.986	n/a	5e+19	Sr	RF sputtering	Ueda, K. et al., 2000. Transparent p-type semiconductor: LaCuOS layered oxysulfide. Applied Physics Letters, 77(17), p.2701.	http://scitation.aip.org/content/aip/journal/apl/77/17/10.1063/1.1319507							0.859933	0.859933	p	0.42	0.356751	0.589816	3VB min	https://materialsproject.org/materials/mp-4081
32	mp-6088	LaCuOS	Sr, self	P4/nmm	6	2018-05-10	0	3.1	3.1	1.6691	1.6691	2.9477	2.9477	0.3		Mg	Reactive solid-phase epitaxy (R-SPE)	Hiramatsu, H. et al., 2003. Degenerate p-type conductivity in wide-gap LaCuOS1xSex (x=0-1) epitaxial films. Applied Physics Letters, 82(7), pp.1048–1050. Available at: http://dx.doi.org/doi/10.1063/1.1544643.	http://dx.doi.org/10.1063/1.1544643							2.13506	0.880015	p	0.458	0.431856	0.577559	2VB min	https://materialsproject.org/materials/mp-6088
33	mp-552488	LaCuOSe	Mg, Mn, self	P4/nmm	4	2018-03-05	0	2.8	2.8	1.5468	1.5468	2.7329	2.7329	140	2.2e+20	Mg	Reactive solid-phase epitaxy (R-SPE)	Hiramatsu, H. et al., 2003. Degenerate p-type conductivity in wide-gap LaCuOS1xSex (x=0-1) epitaxial films. Applied Physics Letters, 82(7), pp.1048–1050. Available at: http://dx.doi.org/doi/10.1063/1.1544643.	http://dx.doi.org/10.1063/1.1544643	4	Mg	Reactive solid-phase epitaxy (R-SPE)		Hiramatsu, H. et al., 2003. Degenerate p-type conductivity in wide-gap LaCuOS1xSex (x=0-1) epitaxial films. Applied Physics Letters, 82(7), pp.1048–1050. Available at: http://dx.doi.org/doi/10.1063/1.1544643.	http://dx.doi.org/10.1063/1.1544643	1.54833	0.652606	p	0.412	0.382883	0.546575	2VB min	https://materialsproject.org/materials/mp-552488
34	mp-1080650	BaCuSF	self, K	P4/nmm	5	2018-03-05	0.00575	3.2	3.2	1.6082	1.6082	2.8003	2.8003	82		K	Solid state reaction	Yanagi, H., Tate, J., Park, S., Park, C.H. and Keszler, D.A., 2003. p-type conductivity in wide-band-gap BaCuQF (Q= S, Se). Applied physics letters, 82(17), pp.2814-2816.	http://aip.scitation.org/doi/abs/10.1063/1.1571224							165.253	0.875634	p	0.545	0.519113	0.667259	2VB min	https://materialsproject.org/materials/mp-1080650/
35	mp-9195	BaCuSeF	self, K	P4/nmm	8	2018-05-10	0	2.9	3	1.4265	1.4265	2.5774	2.5774	43		K	Solid state reaction	Yanagi, H., Tate, J., Park, S., Park, C.H. and Keszler, D.A., 2003. p-type conductivity in wide-band-gap BaCuQF (Q= S, Se). Applied physics letters, 82(17), pp.2814-2816.	http://aip.scitation.org/doi/abs/10.1063/1.1571224							99.9929	0.691432	p	0.51	0.482849	0.648699	2VB min	https://materialsproject.org/materials/mp-9195
36	mp-13287	BaCuTeF	self	P4/nmm	6	2018-05-10	0	3	3	0.9837	0.9837	1.9441	1.9441	167	1.3e+20	undoped	Reactive solid-phase epitaxy (R-SPE!)	Hiramatsu, H., Ueda, K., Ohta, H., Hirano, M., Kamiya, T. and Hosono, H., 2003. Degenerate p-type conductivity in wide-gap LaCuOS 1− x Se x (x= 0–1) epitaxial films. Applied physics letters, 82(7), pp.1048-1050.	http://www.sciencedirect.com/science/article/pii/S0040609007016951	8	undoped	Reactive solid-phase epitaxy (R-SPE!)		Hiramatsu, H., Ueda, K., Ohta, H., Hirano, M., Kamiya, T. and Hosono, H., 2003. Degenerate p-type conductivity in wide-gap LaCuOS 1− x Se x (x= 0–1) epitaxial films. Applied physics letters, 82(7), pp.1048-1050.	http://www.sciencedirect.com/science/article/pii/S0040609007016951	59.9442	0.515698	p	0.52	0.452232	0.684215	2VB min	https://materialsproject.org/materials/mp-13287
37	mp-12444	SrFCuS	Na (sub Sr), O (sub S)	P4/nmm	1	2018-01-02	0	2.9	3.1	1.5103	1.5103	2.84	2.84	30		Na (sub Sr)	"Ceramic route"	Kabbour, H. et al., 2006. P-type transparent conductors Sr 1−x Na x FCuS and SrF 1−x O x CuS: design, synthesis and physical properties. J. Mater. Chem., 16(42), pp.4165–4169.	http://pubs.rsc.org/en/Content/ArticleLanding/2006/JM/B610457F							78.2699	0.923491	p	0.567	0.545859	0.709779	2VB min	https://materialsproject.org/materials/mp-12444
38	mp-9453	Sr2Cu2ZnO2S2	Na	I4/mmm	2	2018-01-02	0.0826533	2.7	2.7	0.673	0.9511	2.2327	2.3239	0.12	1.1e+18	Na	Solid state reaction (sintering)	Hirose, H., Ueda, K., Kawazoe, H., & Hosono, H. (2002). Electronic structure of Sr2Cu2ZnO2S2 layered oxysulfide with CuS layers. Chemistry of materials, 14(3), 1037-1041.	http://pubs.acs.org/doi/pdf/10.1021/cm0105864	0.74	Na	Solid state reaction (sintering)		Hirose, H., Ueda, K., Kawazoe, H., & Hosono, H. (2002). Electronic structure of Sr2Cu2ZnO2S2 layered oxysulfide with CuS layers. Chemistry of materials, 14(3), 1037-1041.	http://pubs.acs.org/doi/pdf/10.1021/cm0105864	5444.88	0.49843	p	0.673	0.650011	0.767687	no	https://materialsproject.org/materials/mp-9453
39	mp-9425	Sr2CuGaO3S	Na	P4/nmm	1	2018-01-02	0.0405416	2.6	2.6	0.5552	0.5553	1.8688	1.8689	0.024		Na	Solid state reaction (sintering)	Ueda, K., Takafuji, K., Hiramatsu, H., Ohta, H., Hirano, M., Hosono, H., & Kawazoe, H. (2002). Wide-gap P-type Conductive Properties in Layered Oxychalcogenides. MRS Online Proceedings Library Archive, 747.	https://doi.org/10.1557/PROC-747-V2.1							162.906	0.822545	p	0.762	0.73971	0.877728	no	https://materialsproject.org/materials/mp-9425
40	mp-15900	Sr3Cu2Sc2O5S2	self	I4/mmm	1	2018-01-02	0.0411872	3.1	3.1	1.693	1.693	3.0216	3.0216	2.8	1.17e+17	undoped	Solid state reaction	Liu, M. L., Wu, L. B., Huang, F. Q., Chen, L. D., & Chen, I. W. (2007). A promising p-type transparent conducting material: Layered oxysulfide [Cu 2 S 2][Sr 3 Sc 2 O 5].	http://aip.scitation.org/doi/abs/10.1063/1.2817643	150	undoped	Solid state reaction		Liu, M. L., Wu, L. B., Huang, F. Q., Chen, L. D., & Chen, I. W. (2007). A promising p-type transparent conducting material: Layered oxysulfide [Cu 2 S 2][Sr 3 Sc 2 O 5].	http://aip.scitation.org/doi/abs/10.1063/1.2817643	425.721	1.07701		0.529329	0.503379	0.56405	2VB min	https://materialsproject.org/materials/mp-15900
41	mp-559044	CuSCN	self, Cl	P6_3mc	28	20-50	0.159	3.4	3.6	2.0695	2.3005	3.2887	3.6038	2		Cl	Dip coating	Perera, V. P. S., Senevirathna, M. K. I., Pitigala, P. K. D. D. P., & Tennakone, K. (2005). Doping CuSCN films for enhancement of conductivity: Application in dye-sensitized solid-state solar cells. Solar energy materials and solar cells, 86(3), 443-450.	http://www.sciencedirect.com/science/article/pii/S0927024804004647							1.19508	1.11619	p(n)	0.411	0.399642	0.508821	2VB min	https://materialsproject.org/materials/mp-559044/
42	mp-8432	CaCuP	self	P6_3/mmc	1	2018-01-02	0	2.78	2.78	0	0	0.5098	1.4364	500		undoped (Cu deficiency likely)	Tube furnace	Williamson, B. A., Buckeridge, J., Brown, J., Ansbro, S., Palgrave, R. G., & Scanlon, D. O. (2016). Engineering Valence Band Dispersion for High Mobility P-Type Semiconductors. Chemistry of Materials.	http://pubs.acs.org/doi/abs/10.1021/acs.chemmater.6b03306							0.328491	0.13885	p	-1.027	-1.12109	0.271042	no	https://materialsproject.org/materials/mp-8432
43	mp-804	GaN	Mg	P6_3mc	1	2018-01-02	0	3.4	3.4	1.7433	1.7433	3.0004	3.0004	5.2	1.9e+19	Mg	Metal-modulated epitaxy (MBE)	Gunning, B. et al., 2012. Negligible carrier freeze-out facilitated by impurity band conduction in highly p-type GaN. Applied Physics Letters, 101(8), p.82106. Available at: http://aip.scitation.org/doi/10.1063/1.4747466 [Accessed January 10, 2017].	http://aip.scitation.org/doi/abs/10.1063/1.4747466	1.71	Mg	Metal-modulated epitaxy (MBE)		Gunning, B. et al., 2012. Negligible carrier freeze-out facilitated by impurity band conduction in highly p-type GaN. Applied Physics Letters, 101(8), p.82106. Available at: http://aip.scitation.org/doi/10.1063/1.4747466 [Accessed January 10, 2017].	http://aip.scitation.org/doi/abs/10.1063/1.4747466	1.64105	1.56093	p	0.747	0.501036	0.982438	2VB min	https://materialsproject.org/materials/mp-804
44	mp-22895	CuI	I, self	F-43m	12	2018-10-20	0.00163159	3.1	3.1	1.1363	1.1363	2.5335	2.5335	283	8.6e+19	I self-doped	Reactive sputtering, Bädeker vapor doping	Yang, Chang, et al. "Room-temperature synthesized copper iodide thin film as degenerate p-type transparent conductor with a boosted figure of merit." Proceedings of the National Academy of Sciences 113.46 (2016): 12929-12933.	http://www.pnas.org/content/113/46/12929.short	9	undoped (likely I self-doped or Cu vacancies)	Reactive RF sputtering (Cu3N); chemical reaction of Cu3N and solid-phase I2		Yamada, N., Ino, R. & Ninomiya, Y., 2016. Truly Transparent p-Type γ-CuI Thin Films with High Hole Mobility. Chemistry of Materials, 28(14), pp.4971–4981. Available at: http://pubs.acs.org/doi/abs/10.1021/acs.chemmater.6b01358 [Accessed January 12, 2017].	http://pubs.acs.org/doi/abs/10.1021/acs.chemmater.6b01358	0.855987	0.855987	p(n)	0.643	0.611501	1.01711	no	https://materialsproject.org/materials/mp-22895
45	mp-22913	CuBr	self	F-43m	3	2018-03-05	0	2.976	3.1	0.486	0.486	2.1769	2.1769	1.5		undoped (Cu vacancies), O doped	Thermal evaporation + oxygen plasma treatment	Vijayaraghavan, R. K., McCoy, A. P., Chauhan, L., Cowley, A., Morris, R. J., Daniels, S., & McNally, P. J. (2014). Influence of oxygen plasma on the growth, structure, morphology, and electro-optical properties of p-type transparent conducting CuBr thin films. The Journal of Physical Chemistry C, 118(40), 23226-23232.	http://pubs.acs.org/doi/abs/10.1021/jp5053997	0.45	undoped (Cu vacancies), O doped	Thermal evaporation + oxygen plasma treatment		Vijayaraghavan, R. K., McCoy, A. P., Chauhan, L., Cowley, A., Morris, R. J., Daniels, S., & McNally, P. J. (2014). Influence of oxygen plasma on the growth, structure, morphology, and electro-optical properties of p-type transparent conducting CuBr thin films. The Journal of Physical Chemistry C, 118(40), 23226-23232.	http://pubs.acs.org/doi/abs/10.1021/jp5053997	1.32832	1.32832	p(n)	1.06	1.06	1.12747	3VB min	https://materialsproject.org/materials/mp-22913/
